# Supplementary material for: SCAN: a nanopore-based, cost effective decision-supporting tool for mass screening of aneuploidies
Source: PubMed Central journal article supplement (PMC11583562; doi:10.1186/s40246-024-00690-w), 2024-11-22
Supplement: 40246_2024_690_MOESM1_ESM.pdf [file 40246_2024_690_MOESM1_ESM.pdf]

# 1 **Supplementary materials**

## 2 **Methods**

### 3 **Sample collection, gDNA extraction and sample preparation**

4 gDNA from patients genetically diagnosed with a chromosomal aneuploidy were purchased  
5 from Coriell Institute (Table S5). Control gDNA from healthy subjects was extracted from swab  
6 samples using Genomic Micro AX Swab Gravity Plus (A&A Biotechnology, Gdansk, Poland,  
7 105-100P) according to the manufacturer's instructions. All gDNA samples were quantified  
8 using Qubit® 1X dsDNA HS Assay Kit on Qubit Fluorometer (Life Technologies, CA, USA).  
9 They were then normalized to approximately 1 ng/μL in UV-treated milli-q water and stored  
10 at 5°C prior to analysis. Sample stocks were stored at -80°C. The DNA extraction step is  
11 estimated to take between 2,5 to 3h for up to 24 samples.

### 12 **Detection of five chromosomal aneuploidies using two-step PCR system**

13 A two-step PCR system targets six chromosomes and incorporates patient specific barcodes.  
14 PCR<sub>1</sub> includes a multiplex setup of primers targeting six chromosomes containing overhangs  
15 for the second PCR (Table S6). Six specific primer pairs were designed to target chromosomes  
16 associated with the most common chromosomal aneuploidies, namely chromosomes 13, 18, 21,  
17 X, and Y. These primer pairs were optimized for high specificity to their target chromosomes  
18 while minimizing the potential for self- and hetero-dimerization. In the multiplex setup, the  
19 average sequence similarity between the generated amplicons was 37% (max = 47%, min =  
20 32%, SD = 4%), ensuring high specificity in sequence classification. Chromosome 15 was  
21 used as a reference in the assay. The PCR<sub>1</sub> reaction mix contained 12μL PCR BIO UltraMix  
22 (PCR Biosystems Ltd, PA, USA PB10.32-05), 2μL of each primer set (5μM each), 1μL of DNA  
23 (~ 5ng/μL), and nuclease-free water to a total volume of 25μL. The PCR<sub>1</sub> thermal conditions

24 were optimized as follows: denaturation at 95°C for 5 min; 15 cycles at 95°C for 30 sec, 63°C  
25 for 30 sec, and 72°C for 45 sec, followed by the final elongation at 72°C for 5 min using a  
26 thermocycler (PCRmax™Alpha Cycler 1, UK). PCR<sub>1</sub>-product was cleaned using AMPure XP  
27 Beads (Beckman Coulter Genomic, Brea, CA, USA) following manufacturer's instructions to  
28 remove excess of primers and resuspended in 11µL of nuclease-free water. The PCR<sub>2</sub> reaction  
29 mix included 10µL of the clean PCR<sub>1</sub>-product, 12µL of PCR BIO UltraMix (PCR Biosystems  
30 Ltd, PA, USA PB10.32-05) and 2µL of barcode primer (10µM). The sequence of the barcodes  
31 used in PCR<sub>2</sub> is given in Table S7. The PCR<sub>2</sub> thermal conditions were as follows: 95°C for  
32 2 min, followed by 30 cycles of 95°C for 20 sec, 55°C for 20 sec, and 72°C for 40 sec. The final  
33 extension was set to 72°C for 4 min using thermocycler (PCRmax™Alpha Cycler 1, UK). The  
34 quality control of the PCR<sub>2</sub>-product was evaluated with gel electrophoresis on a 1,5% agarose  
35 gel stained with Midori Green (Nippon Genetics Co., Ltd., MG04, Tokyo, Japan). The two-step  
36 PCR protocol is estimated to take 2 to 2.5 h for up to 24 samples in four technical replicates.

### 37 **Sequencing Libraries Preparation**

38 PCR<sub>2</sub>-products were pooled within each plate and cleaned with AMPure XP Beads (Beckman  
39 Coulter Genomic, Brea, CA, USA) using 250µL of the pooled PCR<sub>2</sub> product and 80µL of beads.  
40 The motor protein ligation was performed for each four pools individually using ligation proto-  
41 col SQK-LSK110 by Oxford Nanopore Technologies (version: ACDE\_9110\_v110\_revE\_10Nov2020).  
42 The libraries were sequenced on GridION (Oxford Nanopore Technologies, Oxford, UK) using  
43 four R9.4.1 Flow Cells. The ligation protocol takes approximately 2.5 to 3 hours.

### 44 **Second level Multiplexing and Sequencing with Oxford Nanopore Tech-** 45 **nologies**

46 To test the performance of the analysis with second-level multiplexing, the four pooled li-  
47 braries were subjected to barcoding using the native barcoding kit SQK-NBD112.24 by Oxford

48 Nanopore Technologies (version: NBA\_9135\_v112\_revJ\_01Dec2021). The final pool of 384  
49 samples/replicates was sequenced together on a single R9.4.1 Flow Cell. The basecalling and  
50 first level demultiplexing (NBD112.24) was performed live on GridIONx5 (Oxford Nanopore  
51 Technologies, Oxford, United Kingdom) using MinKNOW GUI (version 23.03.3). The native  
52 barcoding protocol is optional when loading more than 24 samples on a single GridION flow  
53 cell and is estimated to take 3 to 3.5 hours.

## 54 **Basecalling, DNA reads processing and sample and chromosome classifica-** 55 **tion**

56 The basecalling is performed using Guppy, the production basecaller integrated within Min-  
57 KNOW. The signal stored within the FAST5 files is processed in real time during the run and  
58 the FASTQ files are generated one by one. Once a FASTQ file is generated, a quality check  
59 and filtering (as a first processing step) of the reads that belong to that particular FASTQ file is  
60 initiated.

61 Every read from the FASTQ file (one FASTQ file contains 4000 sequences) must meet  
62 certain quality criteria. The length of the sequence must be between 900 and 1200 characters  
63 and its average Phred quality score has to be higher than 8 (88% of base call accuracy). The  
64 quality score is calculated based on the average quality values of each base. If the sequence is  
65 longer than 1700 characters, the sequence is split and treated as two separate sequences. The  
66 barcode assigned to the particular sample is used as a splitting point. If the barcode is not found  
67 in the middle of the sequence (between the 100th character from left and the 100th character  
68 from right of the middle character), then the sequence is rejected and it is not used for further  
69 processing.

70 The processing of the qualified DNA reads continues with barcode classification or demul-  
71 tiplexing of the DNA sequences. In particular, the barcode that encodes the information about

72 the person to which the sequence read is associated should be identified. The proposed algo-  
73 rithm uses Levenshtein distance to find the location of the spacer (15 characters) and linker (15  
74 characters) first, and then to identify the barcode (24 characters) located between the spacer and  
75 the linker.

76 The algorithm performs the search on the first and the last 150 characters of the sequence.  
77 First, we find the spacer/linker (Figure S1) by comparing a sliding window (with size 15 and  
78 stride 1) to the known values with Levenshtein Distance less than 5. The barcode should follow  
79 directly after the spacer and before the linker. Once the start and the end of the barcode are  
80 identified we find the most similar barcode from the database and perform the sample classi-  
81 fication. The barcode search is performed using a sliding window technique with size 24 and  
82 stride 1. The distance between the window and the barcode is defined using the Levenshtein  
83 distance and it should be less than 5. This phase has low computational complexity and can be  
84 performed in real-time.

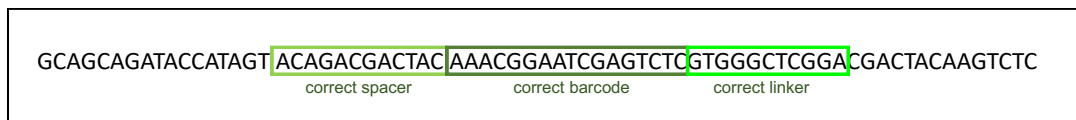

Figure S1: Correct barcode

85 Sometimes, the spacer or the linker could be corrupted (Figure S2), so the start and the end  
86 of the barcode could not be identified precisely. In that case we take the 24 characters that  
87 follow the spacer and try to match with the barcodes in the database. The same procedure is  
88 repeated for the 24 characters that precede the linker. The sequence that has lower Levenshtein  
89 Distance with the barcodes in the database is used for the sample classification. Again, the  
90 maximum Levenshtein Distance which is acceptable for person classification is less than 5.

91 To identify the end of the human DNA sequence we use the same approach. We perform the  
92 search on the last 150 characters taking into account that the linker is in opposite order with the

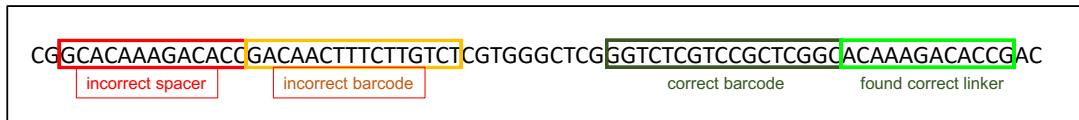

Figure S2: Corrupted barcode

93 replacement of characters T and G with A and C due to the reverse-complement representation.

94 After the demultiplexing of the sequences (sample classification), the process continues  
 95 with the chromosome classification phase. In this phase, similarity scores between each demul-  
 96 tiplexed sequence and the reference chromosome sequences are computed using the BLAST  
 97 alignment method. The used scoring system awards 2 points for a base match, while penaliz-  
 98 ing 3 points for a mismatch, 3 points for extending a gap, and 5 points for opening a gap. A  
 99 sequence is classified as belonging to a specific chromosome only if its final alignment score  
 100 with that chromosome exceeds 250. If multiple chromosomes have alignment scores higher  
 101 than 250, the sequence is assigned to the chromosome with the highest score. Sequences with  
 102 alignment scores below 250 for all chromosomes are rejected and not classified. Chromosome  
 103 sequences and their number grouped by barcode and chromosome are the output of this phase.

104 **Statistical analysis**

105 To assess whether the difference between the samples' representations from the healthy donors  
 106 and the different chromosomal aneuploidies are statistically significant, a Hotelling's t-squared  
 107 statistic ( $t^2$ ) was performed on first three principal components. P-values showed a signifi-  
 108 cant difference for all samples. Hotelling's t-squared statistic is a generalization of Student's  
 109 t-statistic that is used in multivariate hypothesis testing. It tests the differences between the  
 110 (multivariate) means of different populations. The test is applied on the reads proportions ob-  
 111 tained for each barcoded sample normalized using the means and standard deviation of the  
 112 controls in the one vs the rest setup (measures the difference between the population of one

113 disease and the combined populations from the rest of the diseases).

## 114 **Performance for KS decision-supporting tool (EU IVD certification)**

115 EU IVD certification was performed solely on the Klinefelter syndrome. The machine learning  
116 model that was built to discriminate against Klinefelter is a binary SVM classification model.  
117 First, the model was trained and tuned on a separate set of samples that included healthy, Kline-  
118 felter, Angelman (AMS), Prader–Willi syndromes (PWS) and trisomies (13, 18, and 21). After  
119 the training and the tuning phase, the model was tested and evaluated on a different set of test  
120 samples that also included cases from Klinefelter, healthy, trisomy, AMS and PWS. Details  
121 about the training and evaluation phases are given in the following subsections.

### 122 **Model training and parameter tuning**

123 In this phase, we trained a classification model and performed parameter tuning by cross vali-  
124 dation using 278 technical replicates representing respective aneuploidy or healthy subjects (68  
125 KS, 198 healthy, 4 trisomy syndrome, 4 AMS and 4 PWS ). All the samples were obtained from  
126 10 different individuals, generated in 5 individual runs on the Oxford Nanopore Technologies  
127 GridION x5 device. All the samples that did not meet the minimal number of reads per chromo-  
128 some (100 reads per chromosome) from the 5 individual runs were filtered out and not used for  
129 training the model. In each individual run we introduced 4 male and 4 female healthy control  
130 samples, which are used to estimate the quality of the run and the variance between the different  
131 runs. All Klinefelter syndrome samples (68 technical replicates from two patients) were labeled  
132 as positive and all the other samples (including healthy and non Klinefelter syndrome samples)  
133 as negative (210). The parameter tuning of the classifier was performed using stratified 5 fold  
134 cross validation, where 80% of the data were used for training and the other 20% of the data for  
135 classifier validation. In this experiment, SVM with RBF kernel was used as a classifier. Support

136 Vector Machine is a natural binary classifier that works well with small to moderately sized  
137 datasets where the relationship between features and the target is not overly complex, achieving  
138 high accuracy. SVMs can handle both linear and non-linear classification tasks (by applying  
139 kernel functions like RBF, polynomial, and sigmoid, allowing it to transform the original data  
140 into a higher-dimensional space where a linear separation is possible), while avoiding the risk of  
141 overfitting, especially in scenarios with fewer data points. SVM focuses on finding the decision  
142 hyperplane that maximizes the margin between the classes, which leads to better generalization  
143 to unseen data. We have experimented with multiple different classification techniques, but the  
144 best results were achieved using the SVM classifier (in terms of predictive performance and  
145 model complexity).

146 The samples were represented with 8 continuous variables (features):

- 147 1. The normalized discrete probability distribution of chromosome occurrence (calculated as  
148 the proportion or percentage of identified sequences for a specific chromosome relative  
149 to the total number of sequences identified from all chromosomes in each sample) is  
150 provided for that particular sample. This is represented by columns p-chY, p-chX, p-  
151 ch21, p-ch18, p-ch13 and p-ch15 in Table S2.
- 152 2. The average Euclidean distance from the normalized discrete probability distribution of  
153 the sample to the normalized discrete probability distributions of the 4 male healthy con-  
154 trol samples from the corresponding run (column “distance” in Table S2).
- 155 3. The ratio between the chY and chX.

156 The features associated with the chromosomes’ representation were selected by a domain  
157 expert. Additionally, the feature that represents the average Euclidean distance between the  
158 normalized discrete probability distribution of the sample and that of the male healthy control

159 samples was included as a plate normalization measure. Samples closer to the healthy control  
 160 distributions are more likely to be healthy compared to those farther from the control samples.

Table S1: Example of the classified reads grouped per chromosome and barcode for two KS cases

|             | <b>chY</b> | <b>chX</b> | <b>ch21</b> | <b>ch18</b> | <b>ch13</b> | <b>ch15</b> | <b>total</b> |
|-------------|------------|------------|-------------|-------------|-------------|-------------|--------------|
| <b>KS02</b> | 4010       | 12936      | 7623        | 5242        | 1734        | 8047        | 37107        |
| <b>KS91</b> | 2048       | 5337       | 3996        | 3360        | 952         | 4082        | 19775        |

Table S2: Example of the dataset (after normalization and feature engineering) for the KS cases from Table S1

|             | <b>p-chY</b> | <b>p-chX</b> | <b>p-ch21</b> | <b>p-ch18</b> | <b>p-ch13</b> | <b>p-ch15</b> | <b>distance</b> | <b>chY/chX</b> |
|-------------|--------------|--------------|---------------|---------------|---------------|---------------|-----------------|----------------|
| <b>KS02</b> | 0.101        | 0.327        | 0.193         | 0.132         | 0.044         | 0.203         | 0.023           | 0.310          |
| <b>KS91</b> | 0.104        | 0.270        | 0.202         | 0.170         | 0.048         | 0.206         | 0.025           | 0.384          |

## 161 **Model testing and performance evaluation**

162 The evaluation of the binary SVM classifier is performed using new, unseen samples from 2  
 163 KS patients in comparison to either negative samples from two healthy donors or samples from  
 164 10 patients with other chromosomal abnormalities. Data from the healthy controls was used  
 165 to calculate the analytical and the diagnostic sensitivity and data from patients with a chromo-  
 166 somal abnormality different from KS were used to calculate the analytical and the diagnostic  
 167 specificity. Each biological sample was evaluated in quadruplicates (one different barcode for  
 168 each technical replicate).

169 The number of true positive (TP), true negative (TN), false positive (FP) and false negative  
 170 (FN) from four different sequencing runs were calculated overall for each independent tech-  
 171 nical replicate (that is, for each barcode independently) but also, per sample (that is, for each  
 172 four replicates assuming that 75% of the results were coincident, either positive or negative).



173 Inconclusive results (either at barcode level or at patient level) were not taken into account for  
174 TP, TN, FP or FN calculations.

175 Klinefelter positive samples were analyzed 10 times (that is, with 40 different barcodes).  
176 Of the 40 replicates, 32 were classified by the model as "positive" for Klinefelter, that is 80%  
177 TP, 1 was classified by as "negative", that is 2.5% FN and 7 were classified as "inconclusive"  
178 (17.5%). The 32 TP allowed classifying as "positive" 7 samples (replicates of 4) and the FN  
179 did not have an impact on analytical sensitivity as the three remaining replicates were classified  
180 as "positive". Three of the 10 samples were classified as inconclusive (30%).

181 Healthy control samples were analyzed 8 times (that is, with 32 different barcodes). Of the  
182 32 replicates, 30 were classified by the software as "negative" for Klinefelter, that is 94% TN,  
183 and 2 were classified by the software as "inconclusive" (6%). These two inconclusive replicates  
184 belonged to a same patient/run, impeding to correctly classify this sample as negative (and  
185 leaving it as inconclusive); however, this did not have an impact on sensitivity or specificity  
186 calculations. Samples from the other chromosomal abnormalities were analyzed 24 times (that  
187 is, with 96 different barcodes). Of the 96 replicates, 84 were classified by the software as  
188 "negative" for Klinefelter, that is 87.5% TN (that will be added to the 30 TN from healthy  
189 donors for the calculations); 1 was classified by the software as "positive", that is 1% FP and  
190 13 were classified by the model as "inconclusive" (all barcodes provided a results and thus  
191 all were included in the analysis). In total, there were 27 samples (either patients from other  
192 chromosomal abnormality or healthy controls) that were correctly classified as "negative" by  
193 the system, that is 84% and 5 samples that could not be classified as they were reported as  
194 "inconclusive" (16%).

195 **Analytical performance:** Analytical sensitivity (as a measurement of precision) was as-  
196 sessed as the ratio of correctly positives out the total number of positives reported=  $TP/(TP+FP)$ .  
197 At barcode level this value was =  $32/(32+1) = 97.0\%$ . At patient level, this value was =  $7/(7+0)$

Table S3: Performance parameters

|                                     | Analytical sensitivity | Analytical specificity | Accuracy |
|-------------------------------------|------------------------|------------------------|----------|
| Per replicate (per barcode)         | 97.0%                  | 99.1%                  | 98.6%    |
| Per patient (group of 4 replicates) | 100%                   | 100%                   | 100%     |

198 = 100%.

199 Analytical specificity was the ratio of correctly negatives out of the total number of negatives  
 200 reported =  $TN/(TN+FN)$ . At barcode level this value was  $=114/(114+1) = 99.1\%$ . At patient  
 201 level, this value was  $= 27/(27+0) = 100\%$ .

202 Accuracy was calculated as the proportion of correct predictions using the following for-  
 203 mula =  $(TP+TN)/(TP+TN+FP+FN)$  at both, barcode and patient levels, and data is showed in  
 204 Table S3.

205 **Clinical performance:** Diagnostic sensitivity (True Positive Rate, TPR) was assessed as  
 206 the number of individuals having a positive outcome of those who actually have the condition =  
 207  $TP/(TP+FN)$ . At barcode level, this value was  $= 32/(32+1) = 97.0\%$ . At patient level, this value  
 208 was  $= 7/(7+0) = 100\%$ .

209 Diagnostic specificity (True Negative Rate, TNR) was assessed as the number of individuals  
 210 having a negative outcome of those who actually do not have the condition =  $TN/(TN+FP)$ . At  
 211 barcode level, this value was  $=114/(114+1) = 99.1\%$ . At patient level, this value was  $= 27/$   
 212  $(27+0) = 100\%$ .

213 Positive likelihood ratio (LR+) was assessed as the  $TPR / FPR$ . As value of TPR, we used  
 214 the diagnostic sensitivity and as value for the FPR we used  $1-\text{diagnostic specificity} = 99.1$  for  
 215 replicates and 0 per patient. Thus, we only could calculate LR+ for replicates  $= 97.0/99.1 =$   
 216  $0.978$ . Negative likelihood ratio (LR-) was assessed as  $FNR / TNR$ . As value of the FNR, we  
 217 used  $1-\text{diagnostic sensitivity}$  (3 for replicates and 0 per patient) and as value for the TNR we  
 218 used the diagnostic specificity. We could only calculate LR- for replicates  $= 3/97.0 = 0.031$ .

219 The diagnostic odds ratio (DOR) was calculated as a ratio  $LR+/LR- = 0.978/0.031 = 31.30$ .

220 The clinical performance described above are summarized and presented in Table S4.

Table S4: Diagnostic utility

|                                        | Diagnostic sensitivity<br>(TPR=1-FNR) | Diagnostic specificity<br>(TNR=1-FPR) | Positive likelihood ratio<br>$LR+=TPR/FPR$ | Negative likelihood ratio<br>$LR-=FNR/TNR$ | Diagnostic odds ratio<br>$DOR=LR+/LR-$ |
|----------------------------------------|---------------------------------------|---------------------------------------|--------------------------------------------|--------------------------------------------|----------------------------------------|
| Per replicate<br>(per barcode)         | 97.0%                                 | 99.1%                                 | 0.978                                      | 0.031                                      | 32                                     |
| Per patient<br>(group of 4 replicates) | 100%                                  | 100%                                  | N/A*                                       | N/A*                                       | N/A*                                   |

\*N/A states for not applicable as FPR for patient was 0, thus it LR+ cannot be calculated

221 Finally, for statistical analysis of the sensitivity/specificity, ROC analysis was done either  
222 considering the values of "probability of being diagnosed as Klinefelter" or the outcome values  
223 of the model as follows: "negative"=0; "inconclusive"=1; "positive"=2. Both analysis were  
224 performed for barcode and for sample and are visualized using the ROC curves in Figure S3

225 **Limit of Detection:** In order to evaluate the limit of detection (LOD) of the method, we  
226 simulated a KS positive sample in a mosaic configuration with decreasing ratios of 47,XXY  
227 mixed with 46,XY healthy control. The details of the assay design are in Supplementary Table  
228 2, Plate004.

## 229 IVD certification

230 The device used in the study complies with the **ISO 13485:2016** and **ISO 14971:2019** stan-  
231 dards for medical devices, as certified by **LRQA Nederland B.V.**, with Single Registration  
232 Number: **DK-MF-000018618**. The product Phivea® conforms to Directive 98/79/EC on in  
233 vitro diagnostic medical devices.

VALIDATION RUN (probabilities per barcode)

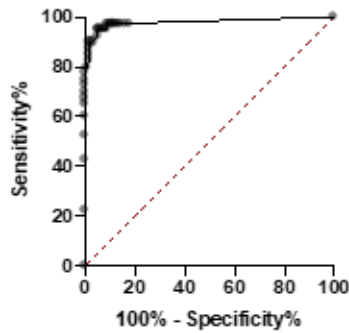

|                          |                 |
|--------------------------|-----------------|
| Area under the ROC curve |                 |
| Area                     | 0.9794          |
| Std. Error               | 0.01605         |
| 95% confidence interval  | 0.9479 to 1.000 |
| P value                  | <0.0001         |

VALIDATION RUN (values per barcode)

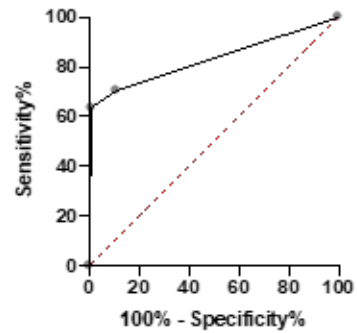

|                          |                  |
|--------------------------|------------------|
| Area under the ROC curve |                  |
| Area                     | 0.8296           |
| Std. Error               | 0.04425          |
| 95% confidence interval  | 0.7429 to 0.9164 |
| P value                  | <0.0001          |

VALIDATION RUN (probabilities per patient)

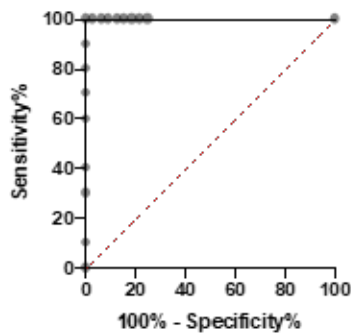

|                          |                |
|--------------------------|----------------|
| Area under the ROC curve |                |
| Area                     | 1.000          |
| Std. Error               | 0.000          |
| 95% confidence interval  | 1.000 to 1.000 |
| P value                  | <0.0001        |

VALIDATION RUN (values per patient)

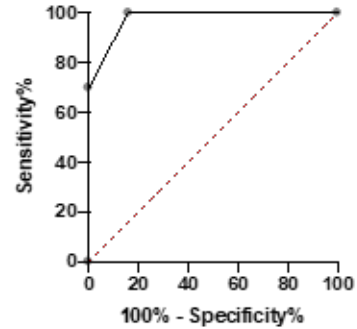

|                          |                 |
|--------------------------|-----------------|
| Area under the ROC curve |                 |
| Area                     | 0.9766          |
| Std. Error               | 0.01927         |
| 95% confidence interval  | 0.9388 to 1.000 |
| P value                  | <0.0001         |

Figure S3: ROC curves for each barcode independently and for each patient represented by quadruplicates.

234 **Supplementary tables**



Table S6: Primers sequence for the multiplex setup. Sequence marked in bold represents the overhang which is a target for barcoding primers during PCR<sub>2</sub>

|                      |                                                     |
|----------------------|-----------------------------------------------------|
| <b>Chromosome Y</b>  |                                                     |
| Forward              | <b>5'-GTCTCGTGGGCTCGGGATCTCTTCAGCGTGGGAGG-</b> '3   |
| Revers               | 3'- <b>GTCTCGTGGGCTCGGGCTGAGAGGGTGAGGACAGGA-</b> '5 |
| <b>Chromosome X</b>  |                                                     |
| Forward              | <b>5'-GTCTCGTGGGCTCGGGAGAGGGAGGAACGCATAGC-</b> '3   |
| Revers               | 3'- <b>GTCTCGTGGGCTCGGAGGGAGCAGAATTGAGGCAC-</b> '5  |
| <b>Chromosome 21</b> |                                                     |
| Forward              | 5'-GTCTCGTGGGCTCGGGTCCCCAGGTAACATCCACG-'3           |
| Revers               | 3'-GTCTCGTGGGCTCGGAGCTATAAGCCAAGGGACGC-'5           |
| <b>Chromosome 18</b> |                                                     |
| Forward              | <b>5'-GTCTCGTGGGCTCGGGTCTAGAGTGGGAGGGGCTA-</b> '3   |
| Revers               | 3'- <b>GTCTCGTGGGCTCGGCCAGCTGGCTGAAATGAAGAA-</b> '5 |
| <b>Chromosome 13</b> |                                                     |
| Forward              | <b>5'-GTCTCGTGGGCTCGGTAGTTGAGGGGTGGCTTTGC-</b> '3   |
| Revers               | 3'- <b>GTCTCGTGGGCTCGGCCTACCTCCCTGTTCTCTGC-</b> '5  |
| <b>Chromosome 15</b> |                                                     |
| Forward              | <b>5'-GTCTCGTGGGCTCGGGTGGGCAGCTTCCAGTAGTT-</b> '3   |
| Revers               | 3'- <b>GTCTCGTGGGCTCGGGCTGAGACTCGGGGTTTGCAT-</b> '5 |

PCR<sub>1</sub> targets the gene of interest during unsaturated PCR and incorporates “linker” sequence that will become a primer binding site for PCR<sub>2</sub>. The linker sequence is palindromic, hence only one barcode primer is needed in PCR<sub>2</sub>. Each primer includes 15 bp spacer separating ONT motor protein adapter from the barcode sequence. The spacer was added to ensure higher tolerance for the low quality at the beginning of the sequence entering the pore and thus higher recovery of barcode sequence. The barcoded DNA constructs are subsequently pooled and motor protein is added using the ligation protocol.

Table S7: Sequence of oligonucleotides used for barcoding with PCR<sub>2</sub>

| barcode name | spacer           | barcode sequence          | linker            |
|--------------|------------------|---------------------------|-------------------|
| BRK01        | GTCCTGCTCCGCTCGG | CACAAAGACACCGACAACTTCTT   | GTCCTGCTGGGCCTCGG |
| BRK02        | GTTAGTTGATGTAGT  | ACAGACGACTACAAACGSAATCGA  | GTCCTGCTGGGCCTCGG |
| BRK03        | GTCCTGCTCCGCTCGG | CCTGTGAACGGGACACAAGACTC   | GTCCTGCTGGGCCTCGG |
| BRK04        | GTTAGTTGATGTAGT  | TAGGGAAACACGATAGAATCCGAA  | GTCCTGCTGGGCCTCGG |
| BRK05        | GTCCTGCTCCGCTCGG | AAGGTTACACAACCCCTGGACAAAG | GTCCTGCTGGGCCTCGG |
| BRK06        | GTTAGTTGATGTAGT  | GACTACTTTCTGCCTTTGCAGAA   | GTCCTGCTGGGCCTCGG |
| BRK07        | GATTGATATAGATA   | AAGGATTCATTTCCACGGTAACAC  | GTCCTGCTGGGCCTCGG |
| BRK08        | GTTAGTTGATGTAGT  | ACGTAACTTGGTTTCTCCCTGAA   | GTCCTGCTGGGCCTCGG |
| BRK09        | GTCCTGCTCCGCTCGG | AACCAAGACTCGCTGCCTAGTT    | GTCCTGCTGGGCCTCGG |
| BRK10        | GTTAGTTGATGTAGT  | GAGAGGACAAAGGTTCAACGCTT   | GTCCTGCTGGGCCTCGG |
| BRK11        | GTTAGTTGATGTAGT  | TCCATTCCCTCCGATAGATGAAC   | GTCCTGCTGGGCCTCGG |
| BRK12        | GTCCTGCTCCGCTCGG | TCCGATTCTGCTCTTTCTACCTG   | GTCCTGCTGGGCCTCGG |
| BRK13        | GTCCTGCTCCGCTCGG | TCACACGAGTATGGAAGCTGTTCT  | GTCCTGCTGGGCCTCGG |
| BRK14        | TACATTGATGCATGG  | TCTATGGTCCCAAGAGACTCGTT   | GTCCTGCTGGGCCTCGG |
| BRK15        | GTTAGTTGATGTAGT  | CAGTGGTGTAGCAGGATAGACCT   | GTCCTGCTGGGCCTCGG |
| BRK16        | TACATTGATGCATGG  | AGTACGAACCACTGTCAGTTGACG  | GTCCTGCTGGGCCTCGG |
| BRK17        | GTCCTGCTCCGCTCGG | ATCCAGGACTACTTCTCGAGGGT   | GTCCTGCTGGGCCTCGG |
| BRK18        | GTTAGTTGATGTAGT  | GCCATGATAGTGTGGCTTTGG     | GTCCTGCTGGGCCTCGG |
| BRK19        | GTTAGTTGATGTAGT  | ATCTCTGACACTGCACGAGGAAC   | GTCCTGCTGGGCCTCGG |
| BRK20        | GTTAGTTGATGTAGT  | ATGAGTTCTGTAACAGGACCGAA   | GTCCTGCTGGGCCTCGG |
| BRK21        | GTTAGTTGATGTAGT  | TAGAGAACGGACAATGAGAGGCTC  | GTCCTGCTGGGCCTCGG |
| BRK22        | GTTAGTTGATGTAGT  | GCTACTTTGATACATGGCAGTGGT  | GTCCTGCTGGGCCTCGG |
| BRK23        | GTCCTGCTCCGCTCGG | CGAGGAGGTTCACTGGTAGTAAG   | GTCCTGCTGGGCCTCGG |
| BRK24        | GTTAGTTGATGTAGT  | CTAACCCATCATGCAAGCAATGTC  | GTCCTGCTGGGCCTCGG |
| BRK25        | GTCCTGCTCCGCTCGG | CATTGGTTCATACCCAACTTAC    | GTCCTGCTGGGCCTCGG |
| BRK26        | TACATTGATGCATGG  | ATGAGAATGCGTAGTCCGCTGATG  | GTCCTGCTGGGCCTCGG |
| BRK27        | GTCCTGCTCCGCTCGG | TGTAAAGGTGAATCTAACCGTCTG  | GTCCTGCTGGGCCTCGG |
| BRK28        | GTTAGTTGATGTAGT  | GATACGGTCCCTTTAAGTTTCA    | GTCCTGCTGGGCCTCGG |
| BRK29        | GTTAGTTGATGTAGT  | GGTCTGCAACCAAGGCTCTAG     | GTCCTGCTGGGCCTCGG |
| BRK30        | GTTAGTTGATGTAGT  | TGGGTGAACTAGATCTCTCACTGA  | GTCCTGCTGGGCCTCGG |
| BRK31        | GTCCTGCTCCGCTCGG | CAATGAACTGATTGCTGTACGCA   | GTCCTGCTGGGCCTCGG |
| BRK32        | GTTAGTTGATGTAGT  | ATGACGTTGTCGGACTTCTACTGG  | GTCCTGCTGGGCCTCGG |
| BRK33        | GTCCTGCTCCGCTCGG | AGTAAACCAACCGTACCAAGTCTG  | GTCCTGCTGGGCCTCGG |
| BRK34        | GTTAGTTGATGTAGT  | GCCTTTGACTTGAAGTCTTCTGTC  | GTCCTGCTGGGCCTCGG |
| BRK35        | GTCCTGCTCCGCTCGG | CGACTCCCTCAGCTTCTGAACTAG  | GTCCTGCTGGGCCTCGG |
| BRK36        | GTTAGTTGATGTAGT  | TGTTTCTCCTCTAACTGGGACAT   | GTCCTGCTGGGCCTCGG |
| BRK37        | GTCCTGCTCCGCTCGG | TGATACTAAGCATCAATCGCAAGC  | GTCCTGCTGGGCCTCGG |
| BRK38        | GTTAGTTGATGTAGT  | TTCTCTATCTGCTCTCTGTTGGT   | GTCCTGCTGGGCCTCGG |
| BRK39        | GTTAGTTGATGTAGT  | GAGAGGCTCTAAGTGGACCTGTGG  | GTCCTGCTGGGCCTCGG |
| BRK40        | GTTAGTTGATGTAGT  | GGCTATCCTTGGTCACTCAAACTA  | GTCCTGCTGGGCCTCGG |
| BRK41        | GTTAGTTGATGTAGT  | CGTGTACTTCTGGACGAACTCC    | GTCCTGCTGGGCCTCGG |
| BRK42        | GTCCTGCTCCGCTCGG | CTGGCAGGTATGCTTACACGTAG   | GTCCTGCTGGGCCTCGG |
| BRK43        | GTTAGTTGATGTAGT  | CTACCGTCCAGTCAACACGAAAG   | GTCCTGCTGGGCCTCGG |
| BRK44        | GTTAGTTGATGTAGT  | GAGTGGAGAGGAAAGCCTTTCTACT | GTCCTGCTGGGCCTCGG |
| BRK45        | GTCCTGCTCCGCTCGG | CACTGAAGGCATCTCTGTTGGATC  | GTCCTGCTGGGCCTCGG |
| BRK46        | GTTAGTTGATGTAGT  | CAGGAGAATGAAGTGGAAACACAGC | GTCCTGCTGGGCCTCGG |
| BRK47        | GTCCTGCTCCGCTCGG | GAACTACCTGTGGGAAAGTTGCAC  | GTCCTGCTGGGCCTCGG |
| BRK48        | GTTAGTTGATGTAGT  | TACAGGTGTACCAAGTCCAGATG   | GTCCTGCTGGGCCTCGG |
| BRK49        | GTCCTGCTCCGCTCGG | CTAGATGTTCAAAGCTGCACAGT   | GTCCTGCTGGGCCTCGG |
| BRK50        | GTTAGTTGATGTAGT  | ACCGAGGAAGTTACCAAGTCCAT   | GTCCTGCTGGGCCTCGG |
| BRK51        | GTCCTGCTCCGCTCGG | GAGGACCCAGTAGGCTCATTCAAC  | GTCCTGCTGGGCCTCGG |
| BRK52        | TACATTGATGCATGG  | GTCCACGAACAATCTTGTCTCTCA  | GTCCTGCTGGGCCTCGG |
| BRK53        | GTCCTGCTCCGCTCGG | CTTTGCATGAGACGGTCTGAATCT  | GTCCTGCTGGGCCTCGG |
| BRK54        | GTTAGTTGATGTAGT  | CATGCTCTTAACTCAAAGCTCTTG  | GTCCTGCTGGGCCTCGG |
| BRK55        | GTCCTGCTCCGCTCGG | CGTAGATCAAGGCTCATCTTCTGA  | GTCCTGCTGGGCCTCGG |
| BRK56        | GTCCTGCTCCGCTCGG | TTCTATGCCACCTGTTGAGTAGTGA | GTCCTGCTGGGCCTCGG |
| BRK57        | TACATTGATGCATGG  | ACTTCCGAAGGAGATTGACCTAGC  | GTCCTGCTGGGCCTCGG |
| BRK58        | GTTAGTTGATGTAGT  | TCAGACTCACGGAGAGTAACTGTG  | GTCCTGCTGGGCCTCGG |
| BRK59        | GTTAGTTGATGTAGT  | ACCTTCTCTTCCCTTCTTGAATGA  | GTCCTGCTGGGCCTCGG |
| BRK60        | GTTAGTTGATGTAGT  | CCATAGAACCCTTTCGTTGAGATG  | GTCCTGCTGGGCCTCGG |
| BRK61        | TACATTGATGCATGG  | GTGCTGAGGCACATAGTACCCTCT  | GTCCTGCTGGGCCTCGG |
| BRK62        | GTTAGTTGATGTAGT  | TACGTCTGAAGTAAAGTGGGTG    | GTCCTGCTGGGCCTCGG |
| BRK63        | GTTAGTTGATGTAGT  | GTTCAAAGACCCAGAACTTCAGAA  | GTCCTGCTGGGCCTCGG |
| BRK64        | GTTAGTTGATGTAGT  | GAAAGTCGATGAACGGTGTCTGTCT | GTCCTGCTGGGCCTCGG |
| BRK65        | GTCCTGCTCCGCTCGG | CCTTGTCTGGAGAAAGACTGASAA  | GTCCTGCTGGGCCTCGG |
| BRK66        | GTCCTGCTCCGCTCGG | GAAAGTTAGAAGCCCAAGGATCGG  | GTCCTGCTGGGCCTCGG |
| BRK67        | TACATTGATGCATGG  | GGTGAACACACAGATGACAAAC    | GTCCTGCTGGGCCTCGG |
| BRK68        | GTCCTGCTCCGCTCGG | CCACCCTTCTGTTTCTTGAATTC   | GTCCTGCTGGGCCTCGG |
| BRK69        | GTTAGTTGATGTAGT  | AGATCACATGAGGCTCGGACTGTA  | GTCCTGCTGGGCCTCGG |
| BRK70        | GTTAGTTGATGTAGT  | AGACTCCATTCTGAGGATCTGGT   | GTCCTGCTGGGCCTCGG |
| BRK71        | GTCCTGCTCCGCTCGG | CTGTTACTACTGATGCTCCAGG    | GTCCTGCTGGGCCTCGG |
| BRK72        | GTTAGTTGATGTAGT  | GTCGGTATGGAAGACAGTCAAGTA  | GTCCTGCTGGGCCTCGG |
| BRK73        | GTCCTGCTCCGCTCGG | GAGGGTTCTGTCTCTCTGTTTCTT  | GTCCTGCTGGGCCTCGG |
| BRK74        | GTTAGTTGATGTAGT  | AGTGGAAAGTGGGATGCTTTGTA   | GTCCTGCTGGGCCTCGG |
| BRK75        | GTCCTGCTCCGCTCGG | ACAAACAGGGTTTCACTCAATGGTC | GTCCTGCTGGGCCTCGG |
| BRK76        | GTTAGTTGATGTAGT  | GTCAGGGTGTATTAACAGCAAT    | GTCCTGCTGGGCCTCGG |
| BRK77        | GTCCTGCTCCGCTCGG | GTTGTATCCCTGAGAAACAGGTCG  | GTCCTGCTGGGCCTCGG |
| BRK78        | GTTAGTTGATGTAGT  | TTCTGATTCAAAGGTTCCGTTGTT  | GTCCTGCTGGGCCTCGG |
| BRK79        | GTCCTGCTCCGCTCGG | CAGCAGTGAGAATATCTCCGAGA   | GTCCTGCTGGGCCTCGG |
| BRK80        | GTTAGTTGATGTAGT  | GAATCGCTATCCTATGTTCTATCCG | GTCCTGCTGGGCCTCGG |
| BRK81        | GTCCTGCTCCGCTCGG | CCSAAACCAACTCACAAAGTAGGG  | GTCCTGCTGGGCCTCGG |
| BRK82        | GTTAGTTGATGTAGT  | TAGTCCCTGAACTCGACATACCGT  | GTCCTGCTGGGCCTCGG |
| BRK83        | GTCCTGCTCCGCTCGG | TTCCACCTTACCTAGATCAAGCCA  | GTCCTGCTGGGCCTCGG |
| BRK84        | GTTAGTTGATGTAGT  | TGGCACAGGTTCTAGGTCACACTAC | GTCCTGCTGGGCCTCGG |
| BRK85        | GTCCTGCTCCGCTCGG | GATCATCCAACTAACTCCTCCGTT  | GTCCTGCTGGGCCTCGG |
| BRK86        | GTCCTGCTCCGCTCGG | TACTTACGCTTGTGGGATCACTCT  | GTCCTGCTGGGCCTCGG |
| BRK87        | GTCCTGCTCCGCTCGG | CCTCCCTAAACACAGGAGCATGTA  | GTCCTGCTGGGCCTCGG |
| BRK88        | GTTAGTTGATGTAGT  | CTGCTTCGGATCGGTAGTGAAGA   | GTCCTGCTGGGCCTCGG |
| BRK89        | GTCCTGCTCCGCTCGG | CAACTAGCCAAACATTGATGCTGT  | GTCCTGCTGGGCCTCGG |
| BRK90        | GTTAGTTGATGTAGT  | GCCTCAAACCCTGACCTCTACATC  | GTCCTGCTGGGCCTCGG |
| BRK91        | TACATTGATGCATGG  | AGTACCCCTGAGTCTATGGAGCC   | GTCCTGCTGGGCCTCGG |
| BRK92        | GTCCTGCTCCGCTCGG | GCTGCTGCTTCTGCTCACTCACA   | GTCCTGCTGGGCCTCGG |
| BRK93        | GTCCTGCTCCGCTCGG | CCCAAGTCTGAAGTGTGAAACT    | GTCCTGCTGGGCCTCGG |
| BRK94        | GTTAGTTGATGTAGT  | GTAGGTGCAAGTGTGAGGACAATC  | GTCCTGCTGGGCCTCGG |
| BRK95        | GTCCTGCTCCGCTCGG | AAGTCCATTCTTCCAGACAGG     | GTCCTGCTGGGCCTCGG |
| BRK96        | TACATTGATGCATGG  | ATGGTGAAGTCTATGACCCTTCAG  | GTCCTGCTGGGCCTCGG |

Barcodes sequence for PCR<sub>2</sub> (5'-3' orientation)
